# Supplementary material for: Exceptional dielectric performance induced by the stepwise reversible phase transitions of an organic crystal: betainium chlorodifluoroacetate
Source: Royal Society of Chemistry journal article supplement (doi:10.1039/c4tc01925c), 2014-01-01
Supplement: c4tc01925c1.pdf [file c4tc01925c1.pdf]

## Supporting Information

### Exceptional Dielectric Performance Induced by the Stepwise Reversible Phase Transitions of an Organic Crystal: Betainium Chlorodifluoroacetate

Zhijia Sun, Shuquan Zhang, Chengmin Ji, Tianliang Chen, and Junhua Luo \*

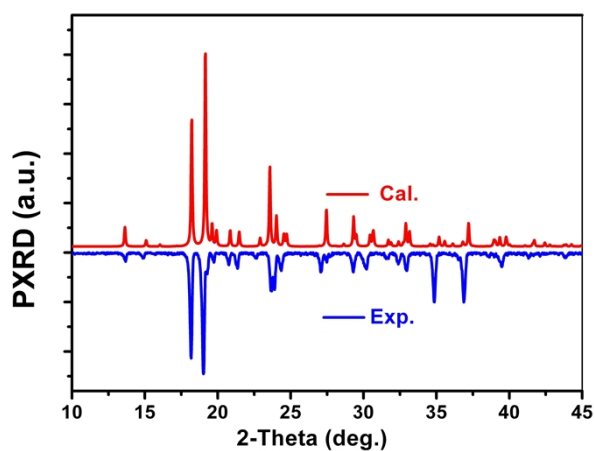

**Figure S1.** Experimental and calculated XRPD patterns of **1** at room temperature.

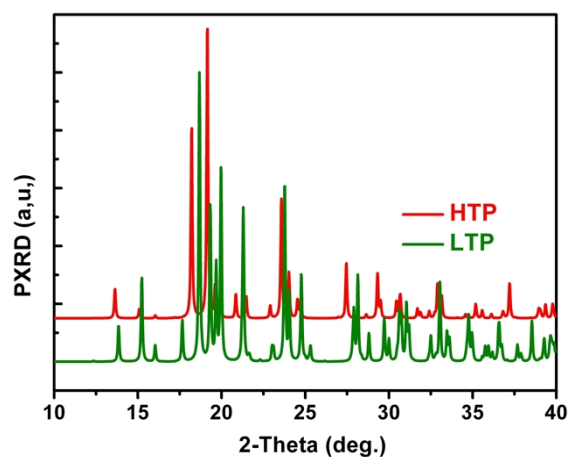

**Figure S2.** XRPD patterns obtained from the single-crystal structure determination of **1** in HTP and LTP, respectively. The obvious discrimination confirms its phase transition process.

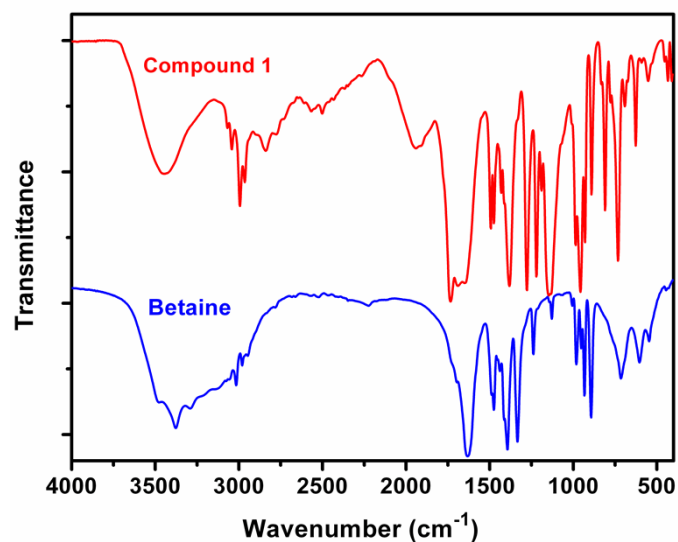

Figure S3. IR spectra of betaine and 1.

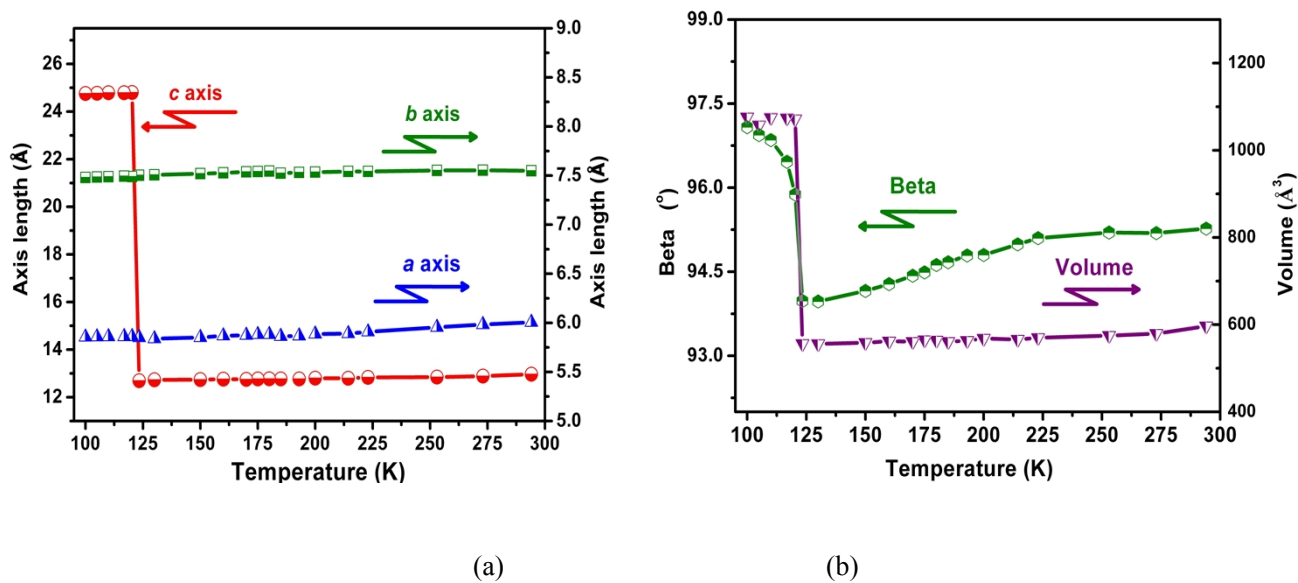

Figure S4. Temperature dependence of (a) cell parameter changes of three axis lengths, and (b) cell volume and  $\beta$  in the range from 100 to 300 K for 1.

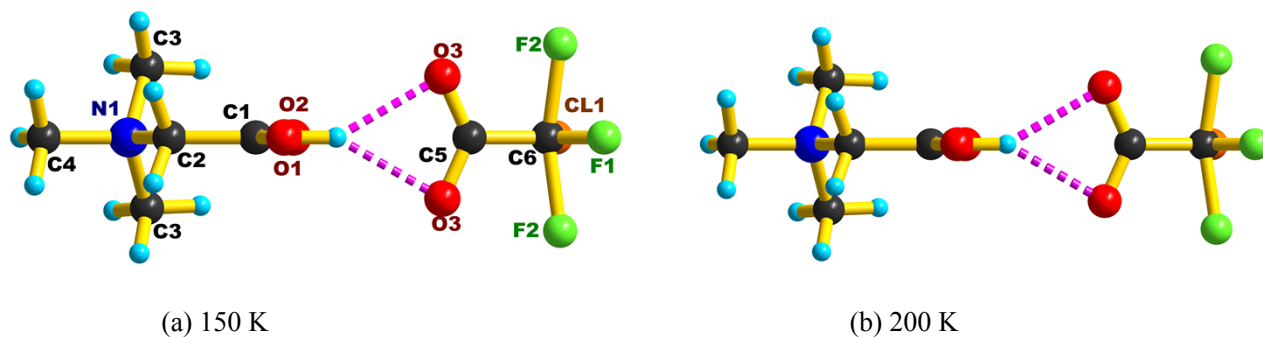

**Figure S5.** Molecular structures of **1** collected at 150 K (a) and 200 K (b), respectively. Chlorodifluoroacetate moieties are slightly disordered and both models are comparable to its structure determined at 230 K, which is labeled as the representative state in its HTP.

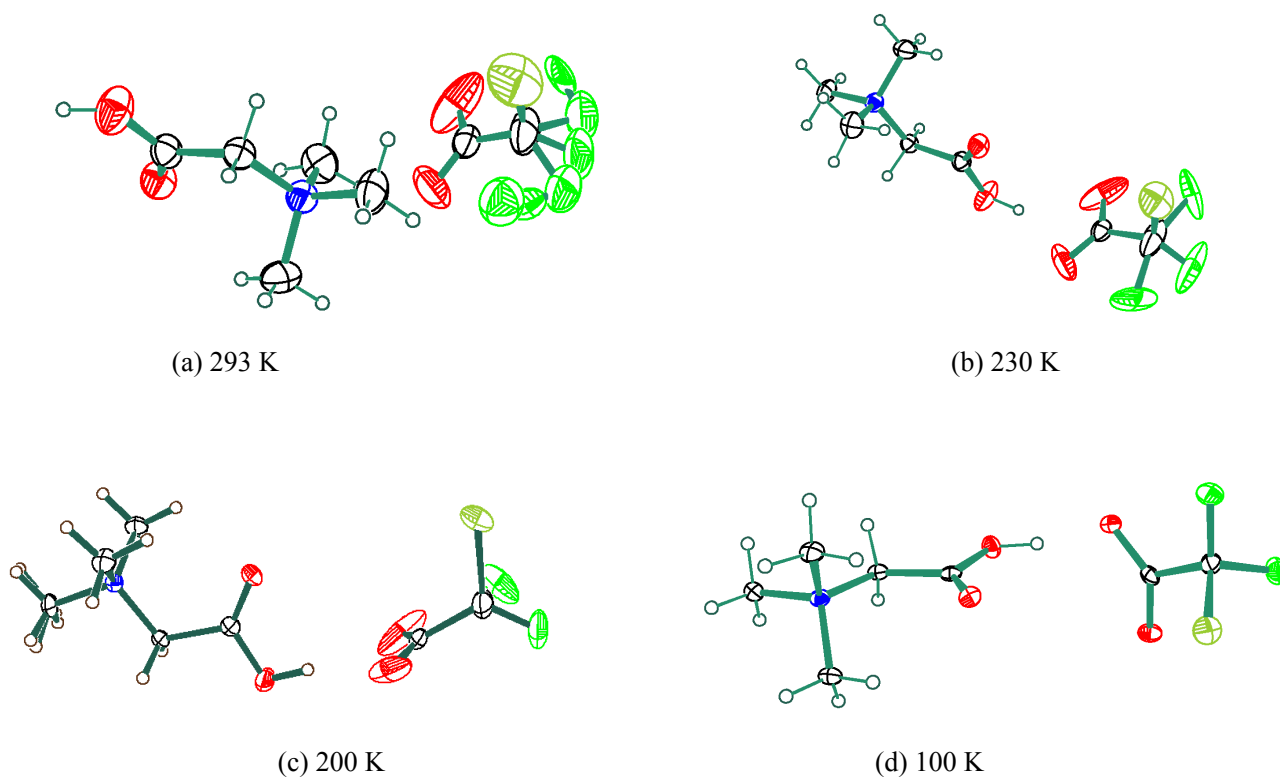

**Figure S6.** Schematic diagram of the thermal ellipsoids (30%) of **1** at different temperatures. The ratio changes of  $U_{\text{eq}}$  (average of F atoms)/ $U_{\text{eq}}$  (N atom in cation) confirm its order-disorder phase transition.

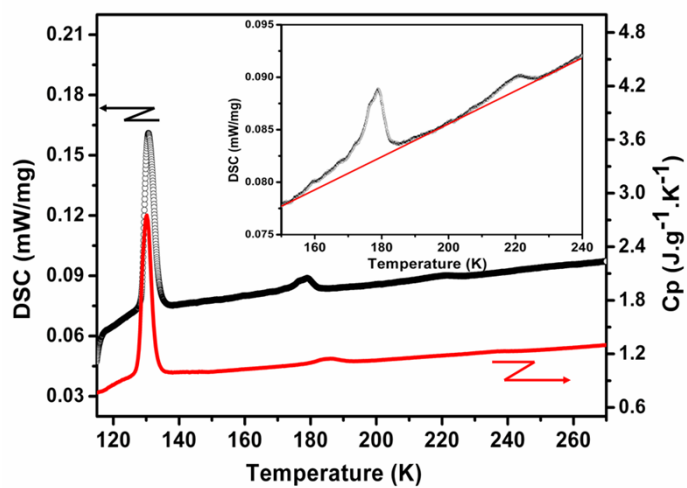

**Figure S7.** DSC and specific heat results measured on the deuterated analogue of **1**. There is no obvious isotope effect on  $T_c$ , which supports the phase transition is mainly induced by the order-disorder transformation.
